# Supplementary material for: Network analysis and cross species comparison of protein–protein interaction networks of human, mouse and rat cytochrome P450 proteins that degrade xenobiotics
Source: Royal Society of Chemistry journal article supplement (doi:10.1039/c6mb00210b), 2016-05-04
Supplement: c6mb00210b1.pdf [file c6mb00210b1.pdf]

### List of Supplementary Tables

Supplementary Table S1 - The list of drug metabolizing CYP enzymes (Data as on November 5, 2013). Protein names underlined are updated ones compared to data of Martignoni et al. (2006).

Supplementary Table S2 - Network centrality parameters of human CYP PPI network. The hub proteins and the centrality parameters are marked in bold.

Supplementary Table S3- Network centrality parameters of mouse CYP PPI network. The hub proteins and the centrality parameters are marked in bold.

Supplementary Table S4 - Network centrality parameters of rat CYP PPI network. The hub proteins and the centrality parameters are marked in bold.

Supplementary Table S5- Average clustering coefficient and characteristic path length distribution of human CYP PPI network by removal of hub proteins in the order of degree. The average clustering coefficient and characteristic path length of the reference human CYP PPI network are 0.725 and 2.095, respectively.

Supplementary Table S6- Average clustering coefficient and characteristic path length distribution of mouse CYP PPI network by removal of hub proteins in the order of degree. The average clustering coefficient and characteristic path length of the reference mouse CYP PPI network are 0.693 and 1.937, respectively.

Supplementary Table S7- Average clustering coefficient and characteristic path length distribution of rat CYP PPI network by removal of hub proteins in the order of degree. The average clustering coefficient and characteristic path length of the reference mouse CYP PPI network are 0.707 and 1.879, respectively.

Supplementary Table S1

| <b>Family</b> | <b>Subfamily</b> | <b>Human</b>    | <b>Mouse</b>    | <b>Rat</b>      |
|---------------|------------------|-----------------|-----------------|-----------------|
| CYP1          | 1A<br>1B         | 1A1, 1A2<br>1B1 | 1A1, 1A2<br>1B1 | 1A1, 1A2<br>1B1 |

|      |    |                                |                                                                                                   |                                                                |
|------|----|--------------------------------|---------------------------------------------------------------------------------------------------|----------------------------------------------------------------|
| CYP2 | 2A | 2A3, 2A4,<br>2A6, 2A7,<br>2A13 | 2A4, 2A5,<br>2A12, 2A22                                                                           | 2A1, 2A2,<br>2A3                                               |
|      | 2B | 2B6, 2B7                       | 2B9, 2B10, 2B13,<br>2B19, 2B23                                                                    | 2B1, 2B2, 2B3, 2B12,<br>2B13, 2B15, 2B21                       |
|      | 2C | 2C8, 2C9,<br>2C18, 2C19        | 2C29, 2C37, 2C38, 2C39,<br>2C40, 2C44, 2C50, 2C53,<br>2C54, 2C55, 2C65, 2C67,<br>2C68, 2C69, 2C70 | 2C6, 2C7, 2C11, 2C12,<br>2C13, 2C22, 2C23,<br>2C24, 2C79, 2C80 |
|      | 2D | 2D6, 2D7,<br>2D8               | 2D9, 2D10, 2D11,<br>2D12, 2D13, 2D22,<br>2D26, 2D34, 2D40                                         | 2D1, 2D2, 2D3,<br>2D4, 2D5, 2D18                               |
|      | 2E | 2E1                            | 2E1                                                                                               | 2E1                                                            |
|      | 2F | 2F1                            | 2F2                                                                                               | -                                                              |
|      | 2J | 2J2                            | 2J5, 2J6, 2J8, 2J9,<br>2J11, 2J12, 2J13                                                           | 2J2/2J4, 2J3/2J9,<br>2J10, 2J13, 2J16                          |
|      | 2R | 2R1                            | 2R1                                                                                               | 2R1                                                            |
|      | 2S | 2S1                            | 2S1                                                                                               | 2S1                                                            |
|      | 2U | 2U1                            | 2U1                                                                                               | 2U1                                                            |
|      | 2W | 2W1                            | 2W1                                                                                               | 2W1                                                            |
| CYP3 | 3A | 3A4, 3A5,<br>3A7, 3A43         | 3A1, 3A11, 3A13,<br>3A16, 3A25, 3A41,<br>3A44, 3A57, 3A59                                         | 3A1/3A23, 3A2,<br>3A9, 3A18, 3A62,<br>3A73                     |

Supplementary Table S2

| S. No.   | Protein       | Degree    | Betweenness Centrality<br>BC(n) | Closeness Centrality<br>CC(n) |
|----------|---------------|-----------|---------------------------------|-------------------------------|
| <b>1</b> | <b>CYP3A4</b> | <b>90</b> | <b>0.08760567</b>               | <b>0.68464730</b>             |

|    |         |    |            |            |
|----|---------|----|------------|------------|
| 2  | CYP1A2  | 86 | 0.07765945 | 0.67346939 |
| 3  | CYP2E1  | 86 | 0.07459228 | 0.67346939 |
| 4  | CYP1A1  | 83 | 0.09792858 | 0.66532258 |
| 5  | CYP2B6  | 83 | 0.04589389 | 0.66532258 |
| 6  | CYP2A6  | 79 | 0.27210067 | 0.64960630 |
| 7  | CYP2C8  | 77 | 0.03946531 | 0.59139785 |
| 8  | CYP2C9  | 76 | 0.04954342 | 0.64705882 |
| 9  | CYP4A11 | 71 | 0.07355107 | 0.63218391 |
| 10 | CYP3A5  | 61 | 0.01297470 | 0.61111111 |
| 11 | CYP2C19 | 54 | 0.01527446 | 0.54098361 |
| 12 | CYP1B1  | 48 | 0.01299541 | 0.51562500 |
| 13 | CYP2C18 | 47 | 0.01551213 | 0.53225806 |
| 14 | GSTP1   | 46 | 0.01262993 | 0.58098592 |
| 15 | GSTM4   | 46 | 0.01262993 | 0.58098592 |
| 16 | GSTK1   | 46 | 0.01262993 | 0.58098592 |
| 17 | CYP2S1  | 46 | 0.00339092 | 0.52884615 |
| 18 | GSTA4   | 45 | 0.01127786 | 0.57894737 |
| 19 | GSTA2   | 45 | 0.01127786 | 0.57894737 |
| 20 | UGT1A4  | 44 | 0.00650047 | 0.57291667 |
| 21 | UGT1A8  | 44 | 0.00650047 | 0.57291667 |
| 22 | UGT1A3  | 44 | 0.00650047 | 0.57291667 |
| 23 | UGT1A7  | 44 | 0.00650047 | 0.57291667 |
| 24 | CYP2A13 | 43 | 0.00301452 | 0.56896552 |
| 25 | CYP2J2  | 42 | 0.00620768 | 0.51724138 |
| 26 | UGT1A9  | 40 | 0.00366353 | 0.56506849 |
| 27 | UGT1A10 | 40 | 0.00366353 | 0.56506849 |
| 28 | UGT1A1  | 40 | 0.00366353 | 0.56506849 |
| 29 | ALOX15  | 39 | 0.01203317 | 0.49253731 |
| 30 | GSTO1   | 39 | 0.00642750 | 0.56701031 |
| 31 | ALOX15B | 39 | 0.00427807 | 0.49253731 |
| 32 | UGT1A6  | 39 | 0.00334477 | 0.56313993 |
| 33 | UGT1A5  | 37 | 0.00625903 | 0.55932203 |
| 34 | UGT2A1  | 37 | 0.00625903 | 0.55932203 |
| 35 | UGT2B11 | 37 | 0.00625903 | 0.55932203 |
| 36 | PLB1    | 36 | 0.00079719 | 0.50769231 |
| 37 | PLA2G16 | 36 | 0.00079719 | 0.50769231 |
| 38 | CYP3A7  | 35 | 0.00475690 | 0.54276316 |
| 39 | EPHX1   | 35 | 0.00210115 | 0.55743243 |
| 40 | MGST3   | 35 | 0.00210115 | 0.55743243 |
| 41 | MGST2   | 34 | 0.00109977 | 0.55555556 |
| 42 | GSTO2   | 34 | 0.00109977 | 0.55555556 |
| 43 | GSTA1   | 34 | 0.00109977 | 0.55555556 |
| 44 | CYP4F2  | 34 | 0.00052115 | 0.48529412 |
| 45 | ALOX12  | 34 | 0.00052115 | 0.48529412 |
| 46 | ALOX12B | 34 | 0.00052115 | 0.48529412 |

|    |          |    |            |            |
|----|----------|----|------------|------------|
| 47 | CYP4F3   | 34 | 0.00052115 | 0.48529412 |
| 48 | CYP2U1   | 34 | 0.00052115 | 0.48529412 |
| 49 | UGT2B17  | 33 | 0.00365860 | 0.55183946 |
| 50 | UGT2B7   | 33 | 0.00365860 | 0.55183946 |
| 51 | GSTM1    | 33 | 0.00100991 | 0.55369128 |
| 52 | MGST1    | 33 | 0.00091727 | 0.55369128 |
| 53 | PTGS1    | 33 | 0.00051422 | 0.48387097 |
| 54 | AOX1     | 32 | 0.00526903 | 0.54276316 |
| 55 | UGT2B4   | 32 | 0.00334477 | 0.55000000 |
| 56 | GSTM3    | 32 | 0.00141662 | 0.55000000 |
| 57 | GSTM5    | 32 | 0.00141662 | 0.55000000 |
| 58 | GSTA5    | 32 | 0.00082277 | 0.55000000 |
| 59 | PTGS2    | 32 | 0.00045177 | 0.48245614 |
| 60 | GSTA3    | 31 | 0.00064027 | 0.54817276 |
| 61 | GSTM2    | 31 | 0.00064027 | 0.54817276 |
| 62 | GSTT1    | 31 | 0.00064027 | 0.54817276 |
| 63 | GSTT2B   | 31 | 0.00064027 | 0.54817276 |
| 64 | ALDH1A2  | 30 | 0.00056906 | 0.53921569 |
| 65 | ALDH1A1  | 30 | 0.00056906 | 0.53921569 |
| 66 | CYP26B1  | 29 | 0.00038966 | 0.53745928 |
| 67 | CYP26C1  | 29 | 0.00038966 | 0.53745928 |
| 68 | CYP26A1  | 29 | 0.00038966 | 0.53745928 |
| 69 | CYP2D6   | 27 | 0.01124713 | 0.52050473 |
| 70 | HSD3B2   | 27 | 0.00158040 | 0.48961424 |
| 71 | HSD3B1   | 27 | 0.00158040 | 0.48961424 |
| 72 | HSD17B6  | 25 | 0.00042409 | 0.46742210 |
| 73 | HSD11B1  | 22 | 0.00034898 | 0.51886792 |
| 74 | KIAA1009 | 22 | 0.00006192 | 0.41561713 |
| 75 | PAFAH1B1 | 22 | 0.00006192 | 0.41561713 |
| 76 | ENKD1    | 22 | 0.00006192 | 0.41561713 |
| 77 | ODF3L2   | 22 | 0.00006192 | 0.41561713 |
| 78 | C9ORF9   | 22 | 0.00006192 | 0.41561713 |
| 79 | CLMP     | 22 | 0.00006192 | 0.41561713 |
| 80 | KIAA1383 | 22 | 0.00006192 | 0.41561713 |
| 81 | HID1     | 22 | 0.00006192 | 0.41561713 |
| 82 | HSD17B7  | 21 | 0.00082626 | 0.46089385 |
| 83 | PLA2G6   | 21 | 0.00027939 | 0.48529412 |
| 84 | PLA2G4A  | 21 | 0.00027939 | 0.48529412 |
| 85 | CYP19A1  | 21 | 0.00025262 | 0.46089385 |
| 86 | TMEM214  | 21 | 0.00004930 | 0.41457286 |
| 87 | SNPH     | 21 | 0.00004419 | 0.41457286 |
| 88 | CLASP2   | 21 | 0.00004416 | 0.41457286 |
| 89 | GRAMD3   | 21 | 0.00004416 | 0.41457286 |
| 90 | PLA2G2C  | 20 | 0.00027939 | 0.48387097 |
| 91 | PLA2G3   | 20 | 0.00027939 | 0.48387097 |

|     |          |    |            |            |
|-----|----------|----|------------|------------|
| 92  | PLA2G12A | 20 | 0.00027939 | 0.48387097 |
| 93  | PLA2G4D  | 20 | 0.00027939 | 0.48387097 |
| 94  | PLA2G1B  | 20 | 0.00027939 | 0.48387097 |
| 95  | PLA2G2E  | 20 | 0.00027939 | 0.48387097 |
| 96  | PLA2G2F  | 20 | 0.00027939 | 0.48387097 |
| 97  | PLA2G2A  | 20 | 0.00027939 | 0.48387097 |
| 98  | PLA2G12B | 20 | 0.00027939 | 0.48387097 |
| 99  | PLA2G5   | 20 | 0.00027939 | 0.48387097 |
| 100 | PLA2G4F  | 20 | 0.00027939 | 0.48387097 |
| 101 | PLA2G4E  | 20 | 0.00027939 | 0.48387097 |
| 102 | PLA2G10  | 20 | 0.00027939 | 0.48387097 |
| 103 | HSD17B1  | 20 | 0.00016890 | 0.45961003 |
| 104 | CBR3     | 20 | 0.00014714 | 0.51562500 |
| 105 | VIMP     | 20 | 0.00004634 | 0.41353383 |
| 106 | DCXR     | 20 | 0.00004634 | 0.41353383 |
| 107 | REEP2    | 20 | 0.00004568 | 0.41353383 |
| 108 | ARL3     | 20 | 0.00004152 | 0.41353383 |
| 109 | SRPRB    | 20 | 0.00003641 | 0.41353383 |
| 110 | SERP1    | 20 | 0.00003230 | 0.41353383 |
| 111 | CYP2F1   | 20 | 0.00000000 | 0.38461538 |
| 112 | PLA2G4B  | 19 | 0.00024795 | 0.48245614 |
| 113 | PLA2G4C  | 19 | 0.00023018 | 0.48104956 |
| 114 | BCL10    | 19 | 0.00004199 | 0.41250000 |
| 115 | GTSE1    | 19 | 0.00003227 | 0.41250000 |
| 116 | SCTR     | 18 | 0.00002336 | 0.41147132 |
| 117 | CLASP1   | 18 | 0.00002336 | 0.41147132 |
| 118 | HSD17B12 | 17 | 0.00058068 | 0.42307692 |
| 119 | COMT     | 17 | 0.00058068 | 0.42307692 |
| 120 | ADH1B    | 16 | 0.00083663 | 0.44836957 |
| 121 | ADH1A    | 16 | 0.00083663 | 0.44836957 |
| 122 | ADH7     | 16 | 0.00083663 | 0.44836957 |
| 123 | ADH6     | 16 | 0.00083663 | 0.44836957 |
| 124 | HSD17B2  | 16 | 0.00013873 | 0.42199488 |
| 125 | UBC      | 13 | 0.00104314 | 0.40243902 |
| 126 | CYP17A1  | 13 | 0.00055426 | 0.47008547 |
| 127 | GPX8     | 11 | 0.00426132 | 0.42968750 |
| 128 | GPX3     | 10 | 0.00016650 | 0.42857143 |
| 129 | GPX2     | 10 | 0.00016650 | 0.42857143 |
| 130 | GPX1     | 10 | 0.00016650 | 0.42857143 |
| 131 | ALDH3A1  | 10 | 0.00002772 | 0.42416452 |
| 132 | ALDH3B2  | 10 | 0.00002772 | 0.42416452 |
| 133 | ALDH1A3  | 10 | 0.00002772 | 0.42416452 |
| 134 | STS      | 9  | 0.00001666 | 0.43535620 |
| 135 | CYP7A1   | 9  | 0.00001666 | 0.43535620 |
| 136 | EPHX2    | 8  | 0.00008612 | 0.46089385 |

|     |         |   |            |            |
|-----|---------|---|------------|------------|
| 137 | SULT2B1 | 8 | 0.00000393 | 0.43421053 |
| 138 | ASMT    | 6 | 0.00008053 | 0.43307087 |
| 139 | HELZ2   | 6 | 0.00000000 | 0.44000000 |
| 140 | NCOA6   | 6 | 0.00000000 | 0.44000000 |
| 141 | TBL1XR1 | 6 | 0.00000000 | 0.44000000 |
| 142 | NCOA2   | 6 | 0.00000000 | 0.44000000 |
| 143 | CHD9    | 6 | 0.00000000 | 0.44000000 |
| 144 | IDO1    | 5 | 0.00018595 | 0.43193717 |
| 145 | TBL1X   | 5 | 0.00007391 | 0.43882979 |
| 146 | IDO2    | 4 | 0.00000635 | 0.43080940 |
| 147 | GPX6    | 4 | 0.00000000 | 0.37671233 |
| 148 | NAT1    | 3 | 0.00064660 | 0.43650794 |
| 149 | XDH     | 3 | 0.00002636 | 0.40740741 |
| 150 | FMO1    | 3 | 0.00000336 | 0.42199488 |
| 151 | FMO2    | 3 | 0.00000336 | 0.42199488 |
| 152 | FMO3    | 3 | 0.00000336 | 0.42199488 |
| 153 | FMO4    | 3 | 0.00000336 | 0.42199488 |
| 154 | SMARCD3 | 3 | 0.00000000 | 0.43650794 |
| 155 | CARM1   | 3 | 0.00000000 | 0.43650794 |
| 156 | TGS1    | 3 | 0.00000000 | 0.43650794 |
| 157 | SULT2A1 | 3 | 0.00000000 | 0.43766578 |
| 158 | UPP2    | 3 | 0.00000000 | 0.39663462 |
| 159 | UMPS    | 3 | 0.00000000 | 0.39663462 |
| 160 | DPYD    | 3 | 0.00000000 | 0.39663462 |
| 161 | MAOA    | 3 | 0.00000000 | 0.42091837 |
| 162 | MAOB    | 3 | 0.00000000 | 0.42091837 |
| 163 | NR1I3   | 2 | 0.00000000 | 0.42525773 |
| 164 | GPX7    | 2 | 0.00000000 | 0.33673469 |
| 165 | AMFR    | 1 | 0.00000000 | 0.40740741 |
| 166 | FOXA1   | 1 | 0.00000000 | 0.34810127 |

Supplementary Table S3

| S. No. | Protein | Degree | Betweenness Centrality<br>BC(n) | Closeness Centrality<br>CC(n) |
|--------|---------|--------|---------------------------------|-------------------------------|
|--------|---------|--------|---------------------------------|-------------------------------|

|    |          |     |            |            |
|----|----------|-----|------------|------------|
| 1  | CYP2C40  | 104 | 0.02079840 | 0.72246696 |
| 2  | CYP2C65  | 104 | 0.01876055 | 0.72246696 |
| 3  | CYP1A2   | 103 | 0.03942039 | 0.70386266 |
| 4  | CYP1A1   | 102 | 0.11913876 | 0.71615721 |
| 5  | CYP2C66  | 102 | 0.01831136 | 0.71615721 |
| 6  | CYP2C70  | 102 | 0.01888152 | 0.71929825 |
| 7  | CYP2C37  | 100 | 0.01514877 | 0.70995671 |
| 8  | CYP2C38  | 99  | 0.01248452 | 0.70689655 |
| 9  | CYP2C44  | 98  | 0.01338895 | 0.70689655 |
| 10 | CYP2C68  | 97  | 0.01673395 | 0.68619247 |
| 11 | CYP2B13  | 96  | 0.02298043 | 0.69787234 |
| 12 | CYP2C54  | 96  | 0.01288974 | 0.69787234 |
| 13 | CYP2C29  | 95  | 0.01341924 | 0.69787234 |
| 14 | CYP2B23  | 94  | 0.01213862 | 0.69198312 |
| 15 | CYP2C55  | 94  | 0.01064725 | 0.69198312 |
| 16 | CYP2B9   | 93  | 0.02246013 | 0.69198312 |
| 17 | CYP2C39  | 93  | 0.00996952 | 0.68333333 |
| 18 | CYP4A14  | 93  | 0.00819293 | 0.65863454 |
| 19 | CYP3A25  | 92  | 0.02045170 | 0.67213115 |
| 20 | CYP4A12A | 92  | 0.01100596 | 0.67213115 |
| 21 | CYP4A12B | 92  | 0.00644724 | 0.65338645 |
| 22 | CYP4A32  | 92  | 0.00686610 | 0.65600000 |
| 23 | CYP3A16  | 91  | 0.01920373 | 0.66938776 |
| 24 | CYP3A41A | 90  | 0.00801428 | 0.66666667 |
| 25 | CYP2B19  | 89  | 0.00860847 | 0.67213115 |
| 26 | CYP3A11  | 89  | 0.00727718 | 0.66396761 |
| 27 | CYP3A13  | 89  | 0.00921975 | 0.66396761 |
| 28 | CYP4A10  | 88  | 0.00560059 | 0.64566929 |
| 29 | CYP2E1   | 87  | 0.03834680 | 0.66938776 |
| 30 | CYP3A44  | 87  | 0.00684991 | 0.65863454 |
| 31 | CYP2B10  | 84  | 0.00752752 | 0.66396761 |
| 32 | CYP2J5   | 67  | 0.00301735 | 0.57142857 |
| 33 | CYP2J11  | 66  | 0.00260030 | 0.56944444 |
| 34 | CYP2J12  | 66  | 0.01417441 | 0.56944444 |
| 35 | CYP2J13  | 66  | 0.00260030 | 0.56944444 |
| 36 | CYP2J8   | 65  | 0.00217364 | 0.56747405 |
| 37 | CYP2J6   | 64  | 0.00205640 | 0.56551724 |
| 38 | CYP2J9   | 64  | 0.00229523 | 0.56551724 |
| 39 | PLB1     | 61  | 0.00105516 | 0.55218855 |
| 40 | UGT1A10  | 60  | 0.00331015 | 0.59205776 |
| 41 | HSD3B5   | 59  | 0.01747014 | 0.59205776 |
| 42 | UGT2A3   | 59  | 0.00515097 | 0.58992806 |
| 43 | UGT2B37  | 59  | 0.00714880 | 0.59420290 |
| 44 | UGT2B5   | 59  | 0.00714880 | 0.59420290 |
| 45 | HSD3B2   | 58  | 0.01671854 | 0.58992806 |

|    |         |    |            |            |
|----|---------|----|------------|------------|
| 46 | HSD3B4  | 58 | 0.01671854 | 0.58992806 |
| 47 | HSD3B6  | 58 | 0.01671854 | 0.58992806 |
| 48 | UGT1A5  | 58 | 0.00329343 | 0.58781362 |
| 49 | UGT1A6B | 58 | 0.00329343 | 0.58781362 |
| 50 | UGT1A9  | 58 | 0.00301082 | 0.58781362 |
| 51 | UGT2A1  | 58 | 0.00329343 | 0.58781362 |
| 52 | UGT2B1  | 58 | 0.00329343 | 0.58781362 |
| 53 | UGT2B34 | 58 | 0.00329343 | 0.58781362 |
| 54 | UGT2B35 | 58 | 0.00329343 | 0.58781362 |
| 55 | UGT2B36 | 58 | 0.00329343 | 0.58781362 |
| 56 | CYP26A1 | 57 | 0.00052800 | 0.56944444 |
| 57 | CYP26B1 | 57 | 0.00052800 | 0.56944444 |
| 58 | CYP26C1 | 57 | 0.00052800 | 0.56944444 |
| 59 | UGT1A1  | 57 | 0.00309063 | 0.58571429 |
| 60 | UGT2B38 | 57 | 0.00671676 | 0.58992806 |
| 61 | HSD3B1  | 56 | 0.01509317 | 0.58571429 |
| 62 | PLA2G16 | 56 | 0.00042000 | 0.54304636 |
| 63 | UGT1A7C | 56 | 0.00285207 | 0.58362989 |
| 64 | ALDH1A1 | 55 | 0.00042300 | 0.56551724 |
| 65 | ALDH1A7 | 55 | 0.00042300 | 0.56551724 |
| 66 | AOX3    | 55 | 0.00048200 | 0.56551724 |
| 67 | ALDH1A2 | 54 | 0.00042300 | 0.56357388 |
| 68 | CYP2S1  | 53 | 0.01077691 | 0.56551724 |
| 69 | CYP2U1  | 53 | 0.00045200 | 0.51735016 |
| 70 | CYP4F14 | 53 | 0.00142076 | 0.56164384 |
| 71 | CYP4F13 | 52 | 0.00058800 | 0.51572327 |
| 72 | CYP4F18 | 52 | 0.00039600 | 0.51572327 |
| 73 | UGT1A2  | 51 | 0.00254167 | 0.56551724 |
| 74 | UGT1A6A | 51 | 0.00254167 | 0.56551724 |
| 75 | CYP1B1  | 50 | 0.02582831 | 0.51090343 |
| 76 | PLA2G4A | 47 | 0.00031100 | 0.52733119 |
| 77 | AOX3L1  | 45 | 0.00029000 | 0.54666667 |
| 78 | PLA2G2C | 45 | 0.00023200 | 0.52396166 |
| 79 | PLA2G2E | 45 | 0.00023200 | 0.52396166 |
| 80 | PLA2G3  | 45 | 0.00023200 | 0.52396166 |
| 81 | PLA2G4C | 45 | 0.00021100 | 0.52396166 |
| 82 | PLA2G6  | 45 | 0.00017700 | 0.52396166 |
| 83 | PLA2G4B | 44 | 0.00013800 | 0.52229299 |
| 84 | PLA2G4D | 44 | 0.00015500 | 0.52229299 |
| 85 | PLA2G4E | 44 | 0.00013800 | 0.52229299 |
| 86 | AOX4    | 43 | 0.00026000 | 0.54125413 |
| 87 | CYP17A1 | 43 | 0.01075581 | 0.55972696 |
| 88 | PLA2G2D | 41 | 0.00016600 | 0.51735016 |
| 89 | CYP2A12 | 40 | 0.00022700 | 0.53074434 |
| 90 | CYP2A4  | 40 | 0.00022700 | 0.53074434 |



|     |          |    |            |            |
|-----|----------|----|------------|------------|
| 91  | CYP2A5   | 40 | 0.00022700 | 0.53074434 |
| 92  | GSTK1    | 40 | 0.01428969 | 0.54125413 |
| 93  | PLA2G12B | 40 | 0.00008470 | 0.51572327 |
| 94  | AOX1     | 39 | 0.00020900 | 0.52903226 |
| 95  | CYP7A1   | 39 | 0.00977838 | 0.55218855 |
| 96  | PLA2G12A | 38 | 0.00007640 | 0.50461538 |
| 97  | PLA2G4F  | 36 | 0.00008470 | 0.50773994 |
| 98  | PLA2G5   | 36 | 0.00004970 | 0.49546828 |
| 99  | GM20441  | 35 | 0.00665962 | 0.52903226 |
| 100 | GSTM3    | 35 | 0.00756092 | 0.52564103 |
| 101 | PLA2G10  | 35 | 0.00000791 | 0.48955224 |
| 102 | PTGS1    | 34 | 0.00005570 | 0.48235294 |
| 103 | GSTA3    | 33 | 0.00695657 | 0.52903226 |
| 104 | GSTA1    | 32 | 0.00423205 | 0.51898734 |
| 105 | GSTM6    | 32 | 0.00423205 | 0.51898734 |
| 106 | MGST2    | 32 | 0.00423205 | 0.51898734 |
| 107 | PLA2G1B  | 31 | 0.00005640 | 0.48377581 |
| 108 | ALOX12B  | 30 | 0.00009040 | 0.47813411 |
| 109 | EPHX2    | 30 | 0.03743042 | 0.51735016 |
| 110 | MGST1    | 30 | 0.01426603 | 0.52229299 |
| 111 | HSD17B6  | 29 | 0.00037900 | 0.50773994 |
| 112 | GSTO2    | 28 | 0.00231564 | 0.51090343 |
| 113 | CYP19A1  | 27 | 0.00020700 | 0.50461538 |
| 114 | HSD17B7  | 27 | 0.00032500 | 0.49397590 |
| 115 | HSD17B2  | 26 | 0.00034600 | 0.49848024 |
| 116 | PTGS2    | 26 | 0.00006640 | 0.46991404 |
| 117 | EPHX1    | 25 | 0.00066400 | 0.49101796 |
| 118 | GSTA2    | 25 | 0.00066400 | 0.49101796 |
| 119 | GSTA4    | 25 | 0.00066400 | 0.49101796 |
| 120 | GSTM4    | 25 | 0.00066400 | 0.49101796 |
| 121 | GSTT2    | 25 | 0.00066400 | 0.49101796 |
| 122 | GSTO1    | 24 | 0.00034600 | 0.45810056 |
| 123 | MGST3    | 24 | 0.00034600 | 0.45810056 |
| 124 | GPX1     | 23 | 0.00065000 | 0.47536232 |
| 125 | GPX2     | 23 | 0.00065000 | 0.47536232 |
| 126 | GPX3     | 23 | 0.00065000 | 0.47536232 |
| 127 | GSTM1    | 23 | 0.00024700 | 0.45682451 |
| 128 | GSTM2    | 23 | 0.00024700 | 0.45682451 |
| 129 | GSTM5    | 23 | 0.00024700 | 0.45682451 |
| 130 | GSTM7    | 23 | 0.00024700 | 0.45682451 |
| 131 | CYP2F2   | 21 | 0.00000000 | 0.37357631 |
| 132 | GSTT1    | 21 | 0.00000000 | 0.37357631 |
| 133 | HSD17B1  | 20 | 0.00018400 | 0.44444444 |
| 134 | H2-KE6   | 19 | 0.00018400 | 0.44324324 |
| 135 | HSD17B12 | 19 | 0.00018400 | 0.44324324 |

|     |          |    |            |            |
|-----|----------|----|------------|------------|
| 136 | SULT2B1  | 16 | 0.00051300 | 0.43501326 |
| 137 | PLA2G2F  | 14 | 0.00000085 | 0.45054945 |
| 138 | ADH1     | 11 | 0.01643239 | 0.46067416 |
| 139 | CYP2D26  | 10 | 0.01220821 | 0.42819843 |
| 140 | CYP2D9   | 9  | 0.00005420 | 0.43157895 |
| 141 | GPX5     | 9  | 0.00000000 | 0.43501326 |
| 142 | CYP2D10  | 8  | 0.00001310 | 0.38228438 |
| 143 | CYP2D11  | 8  | 0.00001310 | 0.38228438 |
| 144 | CYP2D12  | 8  | 0.00001310 | 0.38228438 |
| 145 | CYP2D22  | 8  | 0.00001310 | 0.38228438 |
| 146 | CYP2D34  | 8  | 0.00001310 | 0.38228438 |
| 147 | CYP2D40  | 8  | 0.00001310 | 0.38228438 |
| 148 | HSD11B1  | 6  | 0.00000774 | 0.43733333 |
| 149 | FMO3     | 5  | 0.00000000 | 0.43386243 |
| 150 | SLC22A26 | 5  | 0.00000000 | 0.43386243 |
| 151 | SULT3A1  | 5  | 0.00000000 | 0.43386243 |
| 152 | ASMT     | 4  | 0.00002490 | 0.42159383 |
| 153 | ALDH3B1  | 3  | 0.00000000 | 0.42708333 |
| 154 | IDO1     | 3  | 0.00000000 | 0.42051282 |
| 155 | IDO2     | 3  | 0.00000000 | 0.42051282 |
| 156 | SULT2A1  | 3  | 0.00000000 | 0.42051282 |
| 157 | SULT2A3  | 3  | 0.00000000 | 0.42051282 |
| 158 | ALDH1A3  | 2  | 0.00000000 | 0.40493827 |
| 159 | ALDH3A1  | 2  | 0.00000000 | 0.34893617 |
| 160 | ALDH3B2  | 1  | 0.00000000 | 0.31599229 |
| 161 | CYP2C50  | 1  | 0.00000000 | 0.34166667 |
| 162 | CYP2C67  | 1  | 0.00000000 | 0.34166667 |
| 163 | CYP2C69  | 1  | 0.00000000 | 0.34166667 |
| 164 | CYP3     | 1  | 0.00000000 | 0.36363636 |
| 165 | RDH7     | 1  | 0.00000000 | 0.30036630 |

Supplementary Table S4

| S. No. | Protein | Degree | Betweenness Centrality<br>BC(n) | Closeness Centrality<br>CC(n) |
|--------|---------|--------|---------------------------------|-------------------------------|
|--------|---------|--------|---------------------------------|-------------------------------|

|    |         |    |            |            |
|----|---------|----|------------|------------|
| 1  | CYP2C13 | 89 | 0.03141644 | 0.76331361 |
| 2  | CYP2C22 | 89 | 0.02849139 | 0.76331361 |
| 3  | CYP1A2  | 87 | 0.07898528 | 0.75000000 |
| 4  | CYP2C11 | 87 | 0.02578649 | 0.75438596 |
| 5  | CYP2C6  | 87 | 0.02648254 | 0.75438596 |
| 6  | CYP2C23 | 86 | 0.02547078 | 0.74137931 |
| 7  | CYP2C7  | 86 | 0.02421599 | 0.75000000 |
| 8  | CYP2C12 | 84 | 0.02435053 | 0.74137931 |
| 9  | CYP2B21 | 80 | 0.02134528 | 0.72471910 |
| 10 | CYP4A8  | 79 | 0.04039881 | 0.68983957 |
| 11 | CYP2B2  | 79 | 0.02227807 | 0.72067039 |
| 12 | CYP2B3  | 78 | 0.01790742 | 0.71666667 |
| 13 | CYP2B12 | 78 | 0.01790742 | 0.71666667 |
| 14 | CYP1A1  | 76 | 0.09558997 | 0.69729730 |
| 15 | CYP4A1  | 76 | 0.02343825 | 0.67894737 |
| 16 | CYP4A2  | 76 | 0.02431832 | 0.67894737 |
| 17 | CYP2B1  | 76 | 0.01373117 | 0.70108696 |
| 18 | CYP2E1  | 75 | 0.04898473 | 0.69729730 |
| 19 | CYP3A18 | 68 | 0.01313958 | 0.67187500 |
| 20 | CYP3A1  | 68 | 0.01313958 | 0.67187500 |
| 21 | CYP3A2  | 64 | 0.01300136 | 0.65816327 |
| 22 | CYP2J4  | 56 | 0.00623692 | 0.61428571 |
| 23 | CYP2J10 | 55 | 0.00573124 | 0.61137441 |
| 24 | PLA2G16 | 50 | 0.00157326 | 0.58904110 |
| 25 | ALOX15  | 49 | 0.00299350 | 0.56578947 |
| 26 | PLB1    | 48 | 0.00110190 | 0.58636364 |
| 27 | CYP2U1  | 47 | 0.00148438 | 0.55364807 |
| 28 | ALOX5   | 45 | 0.00194202 | 0.54893617 |
| 29 | CYP2S1  | 44 | 0.01147701 | 0.57333333 |
| 30 | ALOX12B | 43 | 0.00069000 | 0.54430380 |
| 31 | CYP4F6  | 43 | 0.00089600 | 0.54430380 |
| 32 | CYP4F1  | 42 | 0.00073300 | 0.54201681 |
| 33 | CYP4F18 | 42 | 0.00089500 | 0.54201681 |
| 34 | ALOX12E | 42 | 0.00074500 | 0.54201681 |
| 35 | HSD3B   | 41 | 0.02410349 | 0.58904110 |
| 36 | HSD3B5  | 40 | 0.02236574 | 0.58636364 |
| 37 | AOX4    | 40 | 0.00142926 | 0.56331878 |
| 38 | AOX1    | 40 | 0.00142926 | 0.56331878 |
| 39 | UGT1A9  | 40 | 0.00933602 | 0.58636364 |
| 40 | UGT1A8  | 39 | 0.00812537 | 0.58371041 |
| 41 | UGT2B17 | 39 | 0.00410677 | 0.58108108 |
| 42 | ALOX12  | 39 | 0.00041500 | 0.53526971 |
| 43 | AOX3L1  | 39 | 0.00048100 | 0.56086957 |
| 44 | CYP26A1 | 39 | 0.00049500 | 0.56086957 |
| 45 | CYP26B1 | 39 | 0.00049500 | 0.56086957 |

|    |          |    |            |            |
|----|----------|----|------------|------------|
| 46 | CYP26C1  | 39 | 0.00049500 | 0.56086957 |
| 47 | UGT2B1   | 38 | 0.00306495 | 0.57847534 |
| 48 | UGT2A3   | 38 | 0.00298658 | 0.57847534 |
| 49 | UGT2B15  | 38 | 0.00298658 | 0.57847534 |
| 50 | ALDH1A1  | 38 | 0.00141581 | 0.55844156 |
| 51 | YC2      | 37 | 0.01226936 | 0.56086957 |
| 52 | GSTO 2-2 | 37 | 0.01170838 | 0.56086957 |
| 53 | UGT2B10  | 37 | 0.00200532 | 0.57589286 |
| 54 | ALDH1A2  | 37 | 0.00048100 | 0.55603448 |
| 55 | UGT2A1   | 37 | 0.00200532 | 0.57589286 |
| 56 | UGT2B    | 37 | 0.00200532 | 0.57589286 |
| 57 | UGT1A1   | 36 | 0.00276501 | 0.57333333 |
| 58 | GSTM1    | 35 | 0.00371916 | 0.55603448 |
| 59 | GSTA2    | 35 | 0.00371916 | 0.55603448 |
| 60 | PLA2G2A  | 35 | 0.00091800 | 0.55128205 |
| 61 | PLA2G2F  | 35 | 0.00078300 | 0.55364807 |
| 62 | PLA2G3   | 35 | 0.00099900 | 0.55364807 |
| 63 | UGT2B7   | 35 | 0.00236173 | 0.57079646 |
| 64 | PLA2G12B | 35 | 0.00078300 | 0.55364807 |
| 65 | GSTM7    | 34 | 0.00349163 | 0.55364807 |
| 66 | PLA2G4E  | 34 | 0.00049700 | 0.55128205 |
| 67 | PLA2G6   | 34 | 0.00058200 | 0.54893617 |
| 68 | PLA2G2D  | 34 | 0.00062000 | 0.55128205 |
| 69 | PLA2G2C  | 34 | 0.00044500 | 0.55128205 |
| 70 | PLA2G4C  | 34 | 0.00049700 | 0.55128205 |
| 71 | PLA2G12A | 34 | 0.00081100 | 0.55128205 |
| 72 | PLA2G4D  | 33 | 0.00028800 | 0.54893617 |
| 73 | PLA2G4B  | 33 | 0.00028800 | 0.54893617 |
| 74 | GSTK1    | 32 | 0.00265889 | 0.54893617 |
| 75 | PLA2G5   | 32 | 0.00023100 | 0.54430380 |
| 76 | CYP17A1  | 29 | 0.01522251 | 0.55603448 |
| 77 | PLA2G10  | 29 | 0.00052000 | 0.53750000 |
| 78 | STS      | 28 | 0.01466075 | 0.55364807 |
| 79 | EPHX1    | 28 | 0.00181206 | 0.53974895 |
| 80 | SULT2B1  | 28 | 0.01466075 | 0.55364807 |
| 81 | CYP2A1   | 27 | 0.00025200 | 0.52226721 |
| 82 | CYP2A3   | 27 | 0.00025200 | 0.52226721 |
| 83 | PLA2G1B  | 26 | 0.00035700 | 0.52653061 |
| 84 | PLA2G4A  | 26 | 0.00027200 | 0.51807229 |
| 85 | GSTM6    | 24 | 0.00076500 | 0.52868852 |
| 86 | GSTM4    | 24 | 0.00085300 | 0.53086420 |
| 87 | ALOX15B  | 24 | 0.00034800 | 0.49425287 |
| 88 | PTGS2    | 23 | 0.00019400 | 0.47252747 |
| 89 | PLA2G4F  | 22 | 0.00010700 | 0.51600000 |
| 90 | MGST1    | 21 | 0.00021900 | 0.52016129 |

|     |         |    |            |            |
|-----|---------|----|------------|------------|
| 91  | GSTM3   | 21 | 0.00017500 | 0.51394422 |
| 92  | GSTA4   | 20 | 0.00000757 | 0.49425287 |
| 93  | MGST3   | 20 | 0.00000757 | 0.49425287 |
| 94  | GSTO1   | 20 | 0.00000757 | 0.49425287 |
| 95  | MGST2   | 20 | 0.00000757 | 0.49425287 |
| 96  | GSTM2   | 20 | 0.00000757 | 0.49425287 |
| 97  | GSTP1   | 20 | 0.00000757 | 0.49425287 |
| 98  | GSTT2   | 20 | 0.00000757 | 0.49425287 |
| 99  | HSD17B7 | 19 | 0.00028500 | 0.49049430 |
| 100 | CYP19A1 | 18 | 0.00033600 | 0.48496241 |
| 101 | STE2    | 18 | 0.00048400 | 0.47777778 |
| 102 | GPX6    | 16 | 0.00023700 | 0.48496241 |
| 103 | EPHX2   | 15 | 0.03089603 | 0.48496241 |
| 104 | GPX1    | 15 | 0.00016300 | 0.48314607 |
| 105 | PTGS1   | 15 | 0.00009480 | 0.47426471 |
| 106 | HSD17B6 | 12 | 0.00014000 | 0.42857143 |
| 107 | GPX5    | 11 | 0.00000275 | 0.45422535 |
| 108 | CYP7A1  | 10 | 0.00020500 | 0.38278932 |
| 109 | GPX8    | 10 | 0.00000000 | 0.45263158 |
| 110 | SMARCD3 | 9  | 0.00023100 | 0.47426471 |
| 111 | NCOA6   | 8  | 0.00020100 | 0.47252747 |
| 112 | TBL1XR1 | 7  | 0.00005360 | 0.47080292 |
| 113 | TGS1    | 6  | 0.00006060 | 0.46739130 |
| 114 | MED1    | 6  | 0.00000000 | 0.46909091 |
| 115 | NCOA1   | 6  | 0.00000000 | 0.46909091 |
| 116 | CYP2D1  | 6  | 0.00000303 | 0.37829912 |
| 117 | CYP2D3  | 6  | 0.00000303 | 0.37829912 |
| 118 | CYP2D2  | 6  | 0.00000303 | 0.37829912 |
| 119 | CYP2D4  | 6  | 0.00000303 | 0.37829912 |
| 120 | CYP2D5  | 6  | 0.00000303 | 0.37829912 |
| 121 | ADH1C   | 6  | 0.00096300 | 0.40438871 |
| 122 | CBR2    | 6  | 0.00002400 | 0.47426471 |
| 123 | PRIC285 | 4  | 0.00000000 | 0.46402878 |
| 124 | ALDH3A1 | 3  | 0.00014500 | 0.43728814 |
| 125 | ALDH1A3 | 3  | 0.00014500 | 0.43728814 |
| 126 | ALDH3B1 | 3  | 0.00010400 | 0.43728814 |
| 127 | IDO1    | 1  | 0.00000000 | 0.41214058 |
| 128 | NAT3    | 1  | 0.00000000 | 0.43000000 |
| 129 | CYP1B1  | 1  | 0.00000000 | 0.32741117 |
| 130 | CYP2J13 | 1  | 0.00000000 | 0.32741117 |

Supplementary Table S5

| S.No. | List of hubs removed in the order of degree | Degree | Average clustering coefficient | Characteristic path length |
|-------|---------------------------------------------|--------|--------------------------------|----------------------------|
| 1     | CYP3A4                                      | 90     | 0.710                          | 2.113                      |
| 2     | CYP1A2                                      | 86     | 0.708                          | 2.140                      |
| 3     | CYP2E1                                      | 86     | 0.710                          | 2.177                      |
| 4     | CYP1A1                                      | 83     | 0.700                          | 2.238                      |
| 5     | CYP2B6                                      | 83     | 0.692                          | 2.277                      |
| 6     | CYP2A6                                      | 79     | 0.644                          | 2.190                      |
| 7     | CYP2C8                                      | 77     | 0.644                          | 2.220                      |
| 8     | CYP2C9                                      | 76     | 0.644                          | 2.272                      |
| 9     | CYP4A11                                     | 71     | 0.620                          | 2.363                      |
| 10    | CYP3A5                                      | 61     | 0.617                          | 2.491                      |
| 11    | CYP2C19                                     | 54     | 0.600                          | 2.884                      |
| 12    | CYP1B1                                      | 48     | 0.587                          | 3.106                      |
| 13    | CYP2C18                                     | 47     | 0.593                          | 3.119                      |

Supplementary Table S6

| S.No. | List of hubs removed in the order of degree | Degree | Average Clustering coefficient | Characteristic path length |
|-------|---------------------------------------------|--------|--------------------------------|----------------------------|
| 1     | CYP2C40                                     | 104    | 0.691                          | 1.944                      |
| 2     | CYP2C65                                     | 104    | 0.689                          | 1.951                      |
| 3     | CYP1A2                                      | 103    | 0.668                          | 1.966                      |
| 4     | CYP1A1                                      | 102    | 0.681                          | 2.044                      |
| 5     | CYP2C66                                     | 102    | 0.679                          | 2.053                      |
| 6     | CYP2C70                                     | 102    | 0.676                          | 2.061                      |
| 7     | CYP2C37                                     | 100    | 0.674                          | 2.069                      |
| 8     | CYP2C38                                     | 99     | 0.671                          | 2.077                      |
| 9     | CYP2C44                                     | 98     | 0.668                          | 2.085                      |
| 10    | CYP2C68                                     | 97     | 0.666                          | 2.103                      |
| 11    | CYP2B13                                     | 96     | 0.666                          | 2.115                      |
| 12    | CYP2C54                                     | 96     | 0.663                          | 2.125                      |

Supplementary Table S7

| S. No. | List of hubs removed in the order of degree | Degree | Average Clustering coefficient | Characteristic path length |
|--------|---------------------------------------------|--------|--------------------------------|----------------------------|
| 1      | CYP2C22                                     | 89     | 0.703                          | 1.888                      |
| 2      | CYP2C13                                     | 89     | 0.699                          | 1.900                      |
| 3      | CYP1A2                                      | 87     | 0.698                          | 1.925                      |
| 4      | CYP2C11                                     | 87     | 0.693                          | 1.934                      |
| 5      | CYP2C6                                      | 87     | 0.695                          | 1.944                      |
| 6      | CYP2C23                                     | 86     | 0.690                          | 1.958                      |
| 7      | CYP2C7                                      | 86     | 0.685                          | 1.970                      |
| 8      | CYP2C12                                     | 84     | 0.681                          | 2.001                      |
| 9      | CYP2B21                                     | 80     | 0.685                          | 2.019                      |
| 10     | CYP4A8                                      | 79     | 0.678                          | 2.038                      |
| 11     | CYP2B2                                      | 79     | 0.681                          | 2.059                      |
| 12     | CYP2B3                                      | 78     | 0.681                          | 2.070                      |
| 13     | CYP2B12                                     | 78     | 0.679                          | 2.113                      |
| 14     | CYP1A1                                      | 76     | 0.668                          | 2.210                      |
| 15     | CYP4A1                                      | 76     | 0.667                          | 2.229                      |
| 16     | CYP4A2                                      | 76     | 0.650                          | 2.176                      |
| 17     | CYP2B1                                      | 76     | 0.645                          | 2.213                      |
| 18     | CYP2E1                                      | 75     | 0.640                          | 2.393                      |
